# Supplementary material for: Polarized localization of phosphatidylserine in endothelium regulates Kir2.1
Source: bioRxiv or medRxiv preprint supplement (doi:10.1101/2022.08.01.502310), 2022-08-01
Supplement: Supplementary file [file media-1.pdf]

**Supplemental Materials for  
Polarized localization of phosphatidylserine in endothelium regulates Kir2.1**

Claire A. Ruddiman, Richard Peckham, Melissa A. Luse, Yen-Lin Chen, Maniselvan Kuppusamy, Bruce Corliss, P. Jordan Hall, Chien-Jung Lin, Shayn M Peirce, Swapnil K. Sonkusare, Robert P. Mecham, Jessica E. Wagenseil, Brant E. Isakson\*

\*Corresponding author. Email: [brant@virginia.edu](mailto:brant@virginia.edu)

**This PDF file includes:**

Figs. S1 to S8

Tables S1 to S3

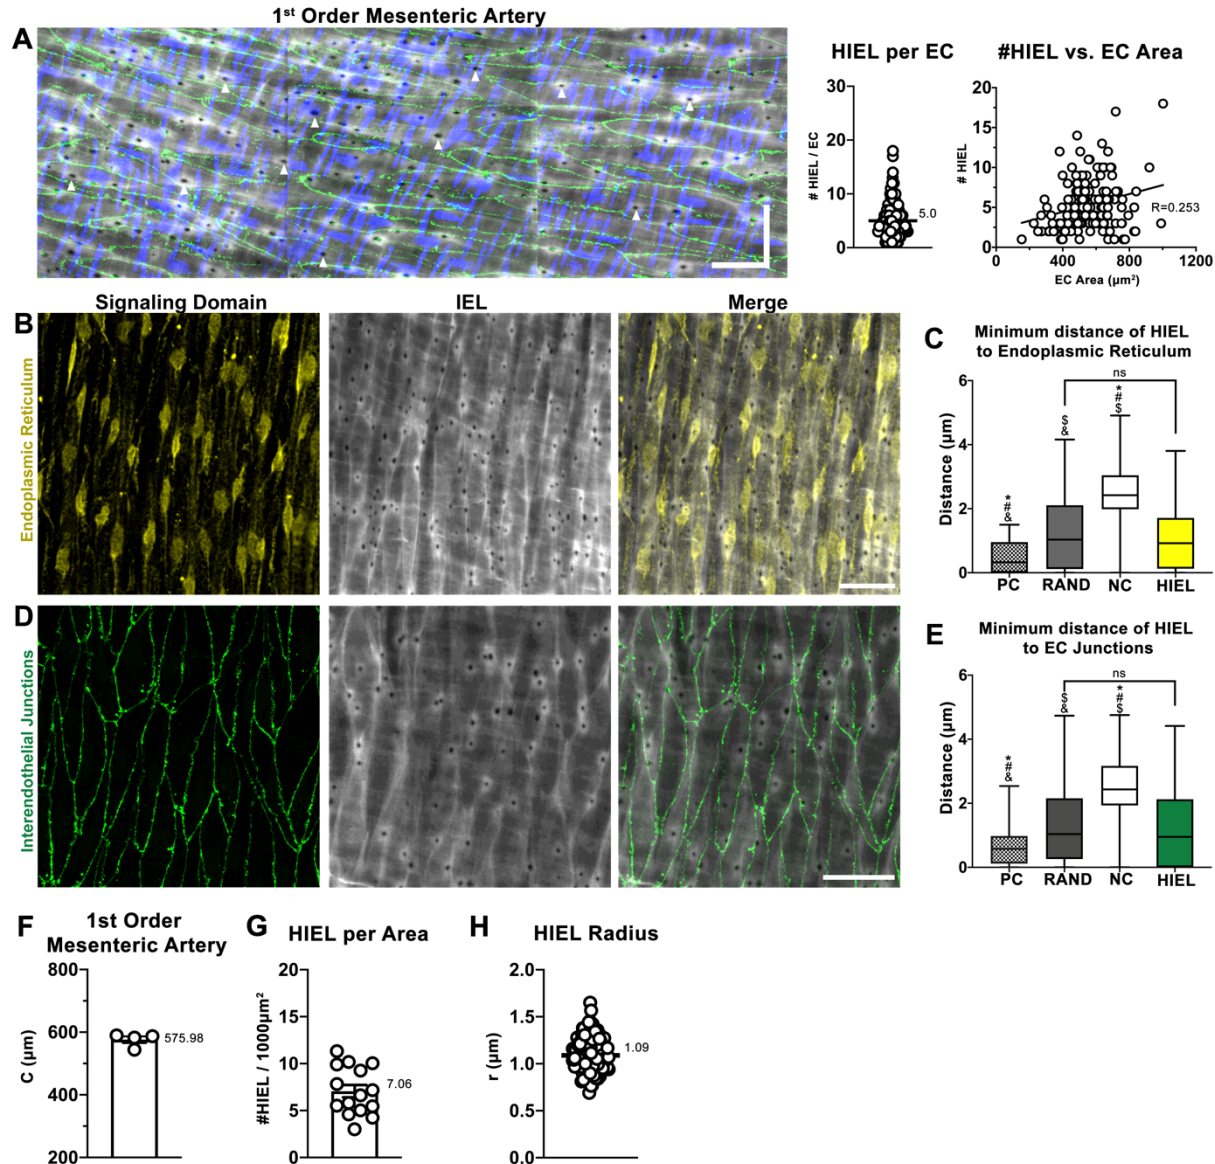

**Figure S1: HIEL are randomly distributed with respect to endothelial signaling hubs in first order mesenteric arteries.** (A) Representative stitched confocal image of a first order mesenteric artery prepared *en face* and stained for nuclei (blue) via DAPI, the IEL (grey) via Alexa-Fluor 488-linked hydrazide, and interendothelial junctions (green) via claudin-5. Scale bar is 30 $\mu$ m in both directions. Quantification of HIEL per EC and correlation of HIEL per EC versus EC area. N=4 mice, n=4 arteries, n=12 ROIs, and n=155 ECs. (B) Representative *en face* confocal image of endoplasmic reticulum (ER, yellow) detected via calnexin and IEL (grey), (C) box and whiskers plot of minimum distance of real-world HIEL centers to ER compared to Matlab-simulated HIEL centers. N=1 mouse, n=1 artery, n=2 ROIs, Area= 6.96x10<sup>4</sup>  $\mu$ m<sup>2</sup>, and n=315 HIEL. (D) Representative *en face* confocal image of interendothelial junctions (green) detected via claudin-5 and IEL (grey), (E) box and whiskers plot of minimum distance of real-world HIEL centers to interendothelial junctions compared to Matlab-simulated HIEL centers. N=6 mice, and n=10 arteries, n=15 ROIs, Area=1.66x10<sup>5</sup>  $\mu$ m<sup>2</sup>, and n=1200 HIEL. Statistical test: Brown-Forsythe and

Welch ANOVA. # indicates a  $p < 0.0001$  significant difference to real-world HIEL distribution, \* indicates a  $p < 0.0001$  significant difference to RAND, \$ indicates a  $p < 0.0001$  significant difference to NC distribution, and & indicates a  $p < 0.0001$  significant difference to PC. (F) Circumference (C) of first order mesenteric arteries measured as the width of the artery in an *en face* preparation. N=4 mice, n=4 arteries. (G) HIEL per area taken from *en face* images that were used for HIEL spatial pattern analysis with respect to claudin-5. Number of HIEL was determined via the in-house Matlab program. (H) HIEL radius measurements obtained from in-house Matlab program.

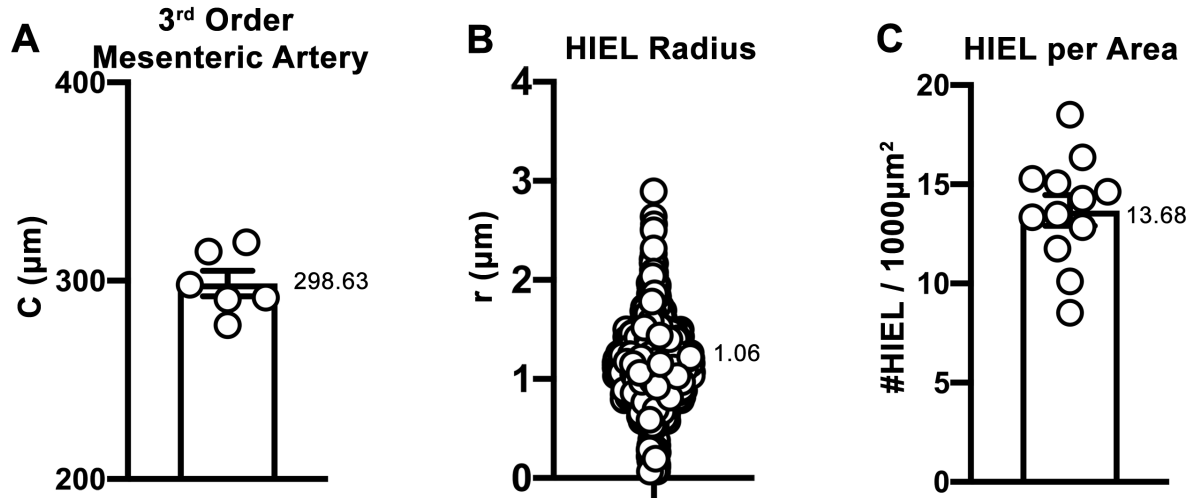

**Figure S2: Quantitative data obtained from third order mesenteric artery *en face* preparations.** (A) Circumference of third order mesenteric arteries measured as the width of the artery in an *en face* preparation. N=5 mouse, n=6 arteries. (B) HIEL radius measurements obtained from in-house Matlab program. N=6 mice, and n=10 arteries, n=22 ROIs, Area= $1.48 \times 10^5 \mu\text{m}^2$ , and n=2166 HIEL. (C) HIEL per area taken from *en face* images used in Matlab analysis. Number of HIEL was determined via the in-house Matlab program. N=4 mice, n=4 arteries, n=12 ROIs, and Area= $1.67 \times 10^5 \mu\text{m}^2$ .

### *In vitro* Vascular Cell Co-Culture

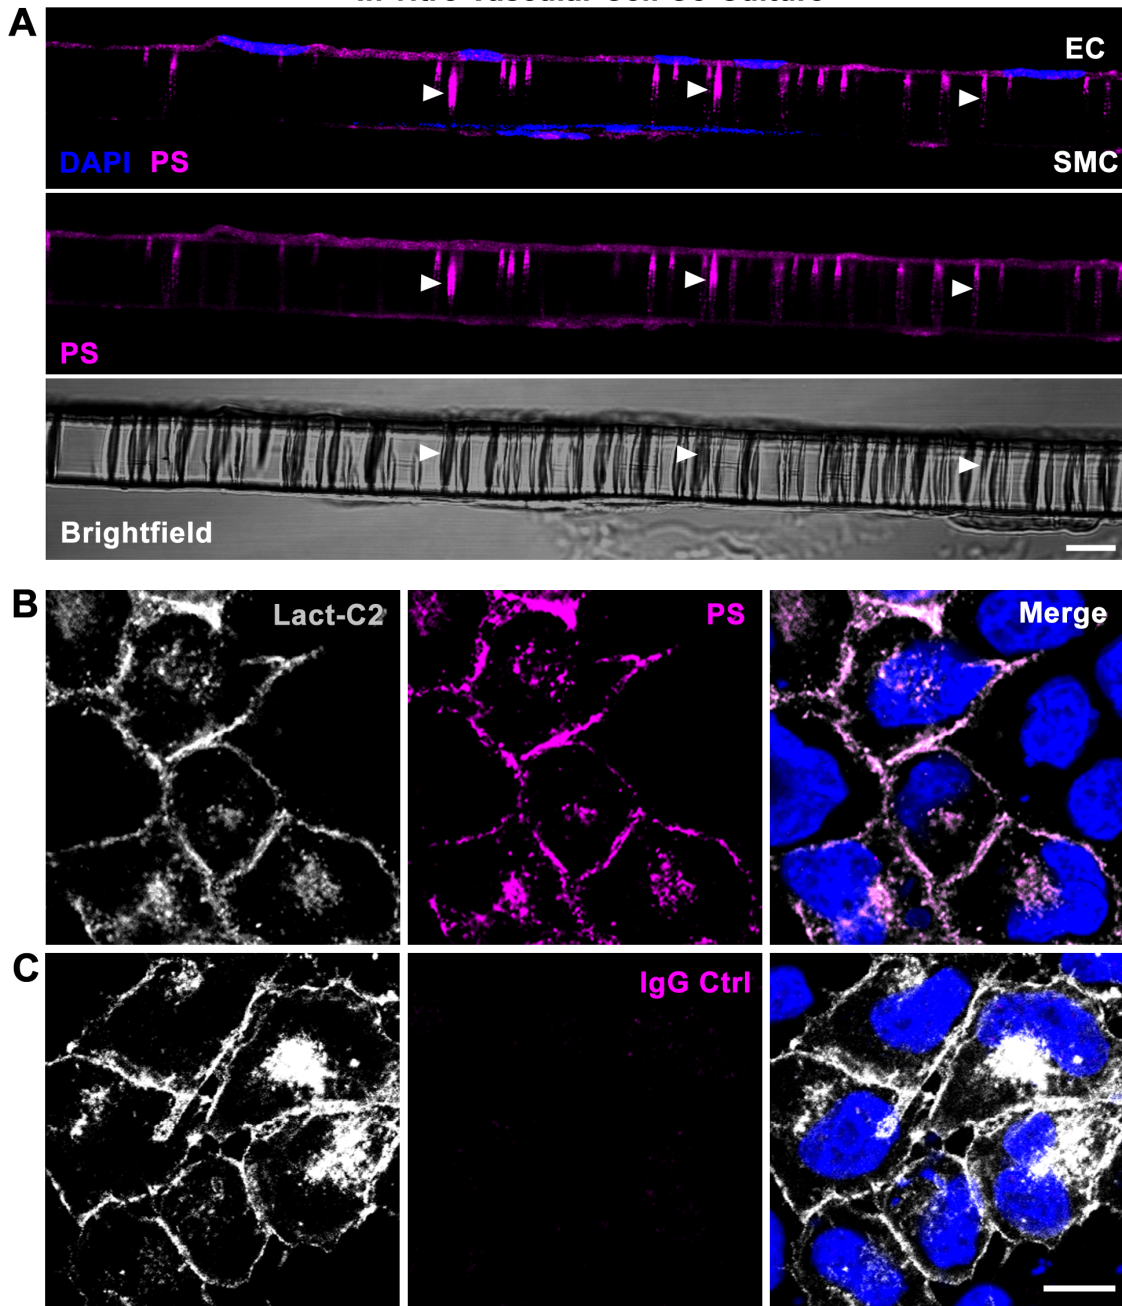

**Figure S3: Validation of PS antibody.** (A) Transverse cross-sections of an *in vitro* vascular cell co-culture model where EC and SMC are plated on either side of a Transwell. Nuclei (blue) are detected via DAPI and PS (magenta). Brightfield image of Transwell is shown in the bottom panel. Arrowheads indicate PS localization to *in vitro* MEJs. (B) HeLa cells transfected with Lact-C2-GFP plasmid (white) and co-stained with PS antibody or (C) IgG control. Nuclei (blue) are detected via DAPI. Scale bars are 10µm.

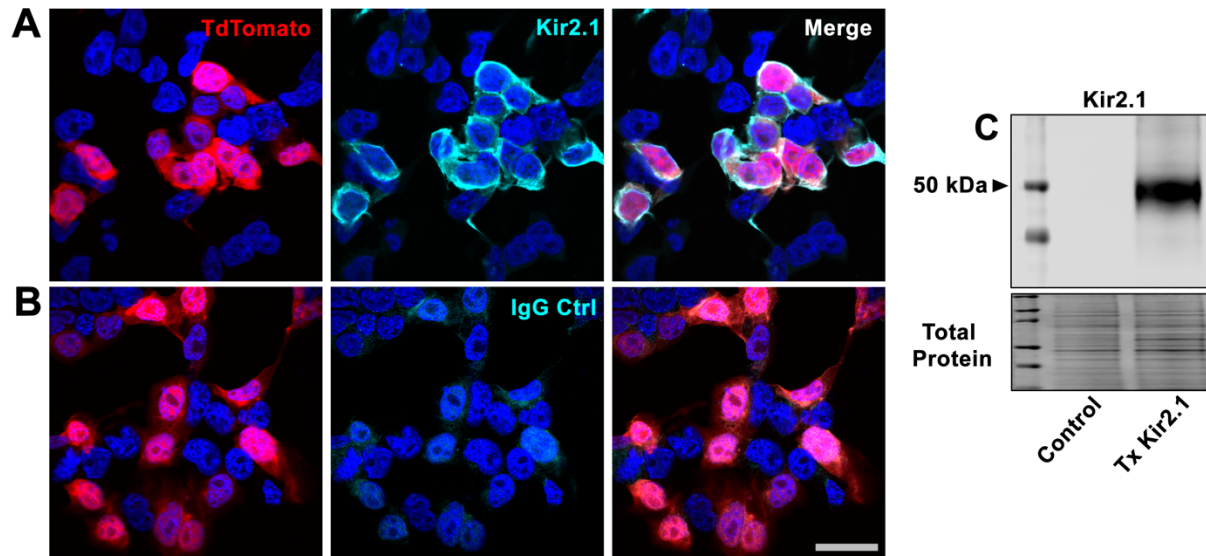

**Figure S4: Validation of Kir2.1 antibody.** (A) HEK293T cells transfected with Kir2.1-T2A-tdTomato plasmid (red) and co-stained with PS antibody or (B) IgG control. Nuclei (blue) are detected via DAPI. Scale bar is 30 $\mu$ m. (C) Western blot detection of Kir2.1 protein in HEK293T cells that were untreated or transfected with Kir2.1-T2A-tdTomato plasmid. Total protein was used as a loading control.

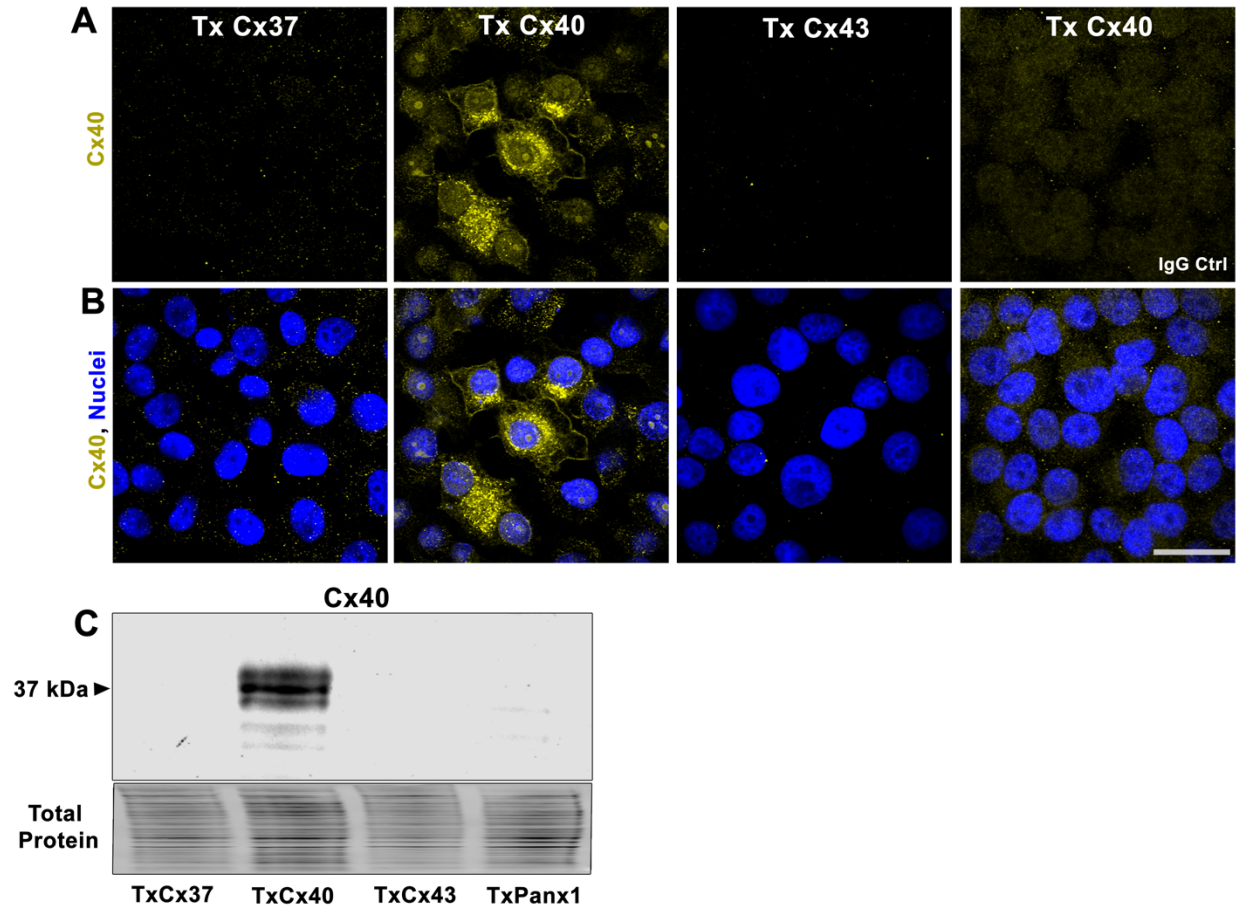

**Figure S5: Validation of Cx40 antibody.** (A) HeLa cells transfected with a connexin plasmid, either connexin 37 (Tx Cx37), connexin 40 (Tx Cx40), or connexin 43 (Tx Cx43), then stained using a Cx40 antibody or IgG control to evaluate Cx40 antibody specificity. Nuclei (blue) are detected via DAPI. Scale bar is 30 $\mu$ m. (C) Western blot detection of Cx40 protein in HeLa cells that were transfected with plasmids for Cx37, Cx40, Cx43, and Panx1. Total protein was used as a loading control.

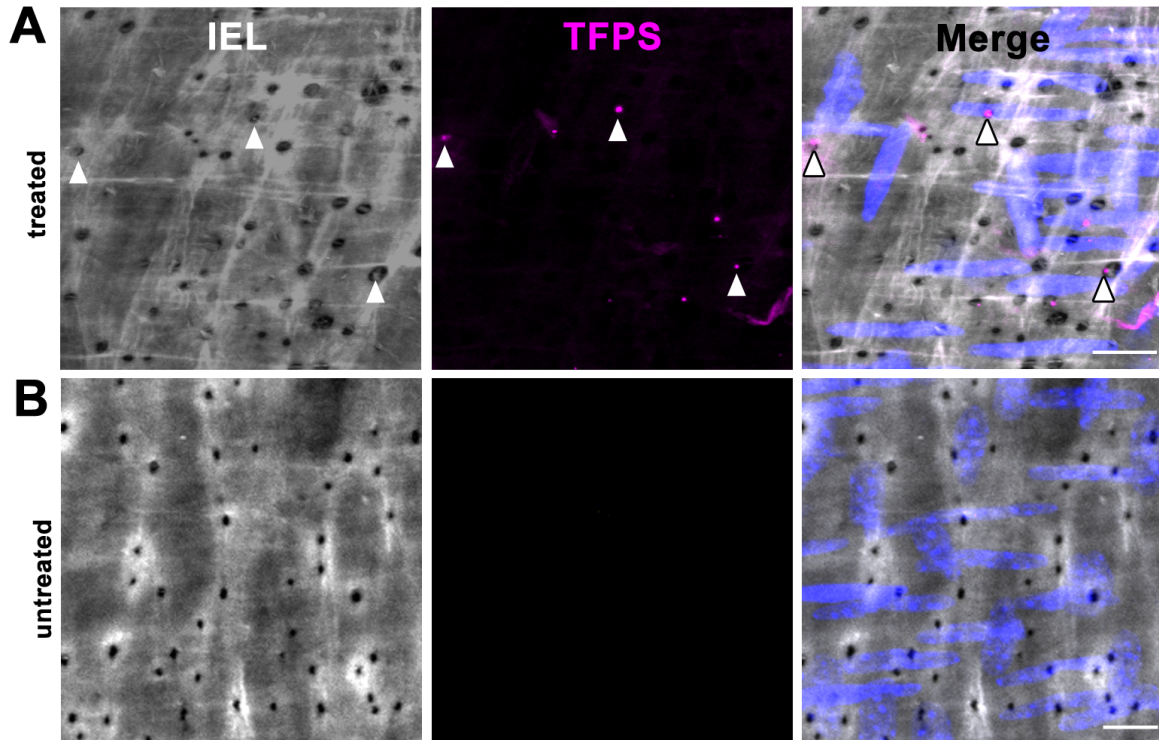

**Figure S6: Exogenous application of TopFluor-PS localizes to the MEJ in intact third order mesenteric arteries.** Live third order mesenteric arteries prepared *en face* after treatment with (A) 10 $\mu$ M TopFluor-PS in the bath solution of a pressure myography setup or (B) without treatment. Nuclei (blue) are detected via DAPI and IEL (grey) is detected via Alexa Fluor linked hydrazide. Arrowheads indicate TopFluor-PS localization to MEJ. Scale bars are 10 $\mu$ m.



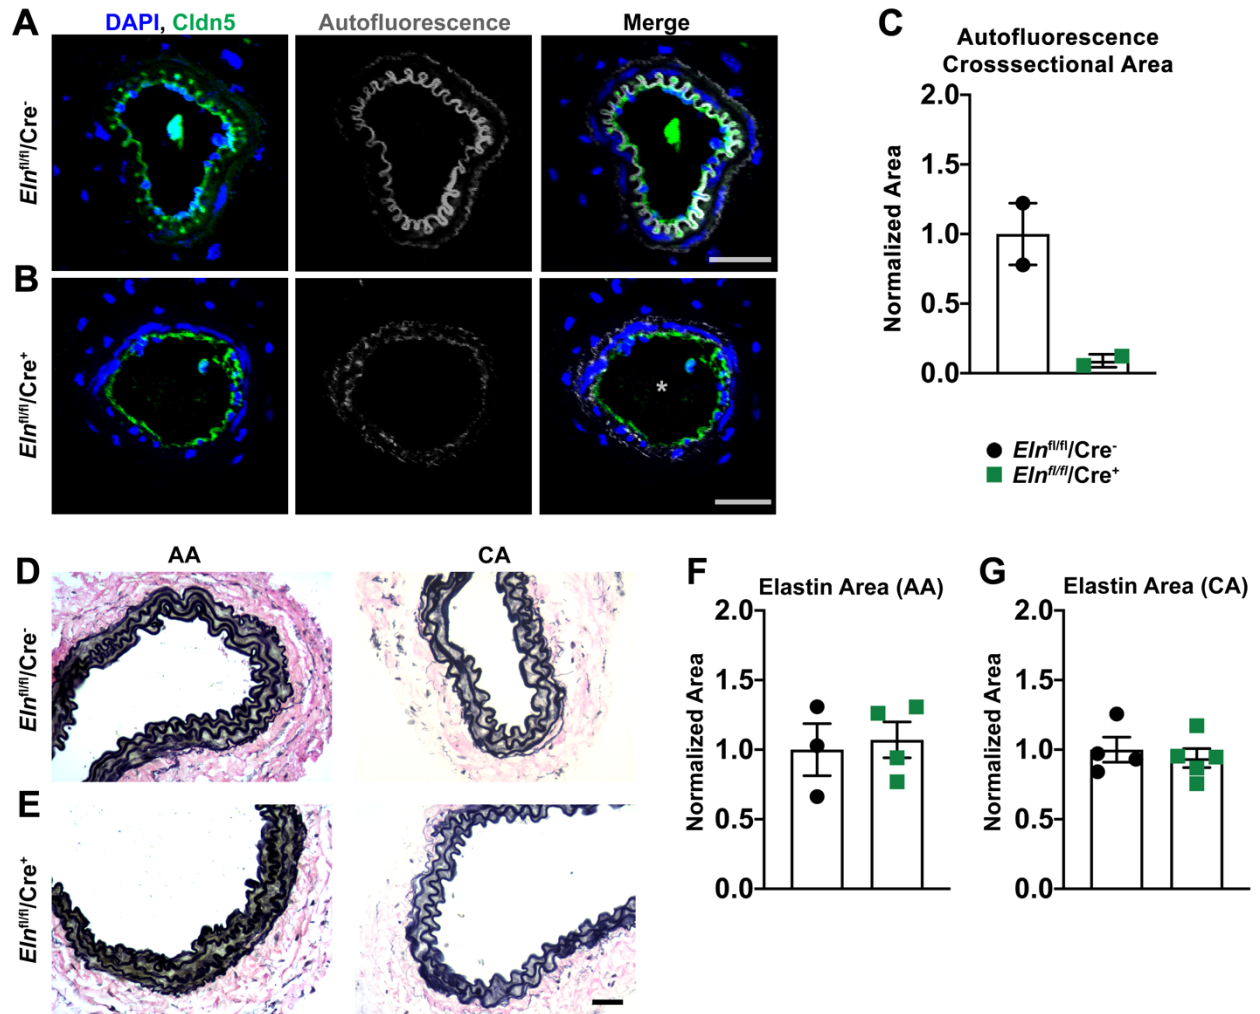

**Figure S7: EC-specific knockout of elastin disrupts IEL in resistance arteries and not large conduit arteries.** Representative images of cross-sections from third order mesenteric arteries taken from (A) *Eln<sup>fl/fl</sup>/Cre<sup>-</sup>* and (B) *Eln<sup>fl/fl</sup>/Cre<sup>+</sup>* mice where nuclei (blue) are detected via DAPI, IEL (grey) is detected via autofluorescence, and interendothelial junctions (green) are detected via claudin-5. Scale bar is 30 $\mu$ m. N=2 mice per group. (C) Quantification of cross-sectional IEL area detected via autofluorescence. Representative images of cross-sections from the abdominal aorta (AA) and carotid artery (CA) of (D) *Eln<sup>fl/fl</sup>/Cre<sup>-</sup>* and (E) *Eln<sup>fl/fl</sup>/Cre<sup>+</sup>* mice. Scale bar is 30 $\mu$ m. Quantification of Verhoeff stain in (F) AA and (G) CA. N= 3-5 mice per group. Student's t-test.

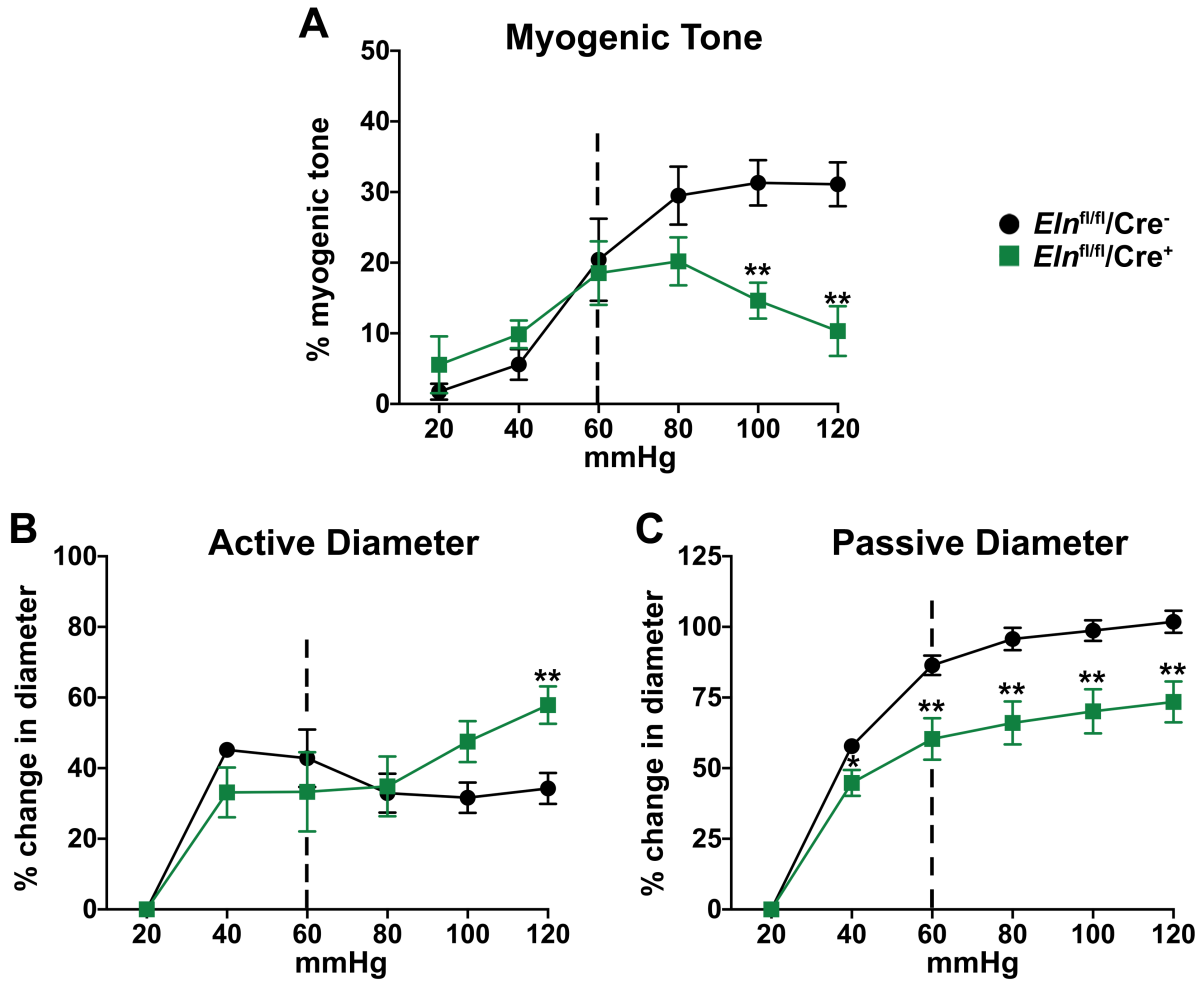

**Figure S8: Determination of optimal pressure for myography experiments on *Eln<sup>fl/fl</sup>/Cre<sup>+</sup>* mice.** Pressure myography experiments on third order mesenteric arteries from *Eln<sup>fl/fl</sup>/Cre<sup>-</sup>* and *Eln<sup>fl/fl</sup>/Cre<sup>+</sup>* mice, where (A) is myogenic tone, (B) is the active diameter, and (C) is the passive diameter. Dotted line indicates the optimal pressure for *Eln<sup>fl/fl</sup>/Cre<sup>+</sup>* arteries. N=3 mice per group, n=4-6 arteries per group. Students t-test was performed at each pressure. \* indicates p<0.050, and \*\* indicates p<0.010.

| <b>Variable</b>                           | <b>Value</b> | <b>Unit</b>                  | <b>Source</b>                                        | <b>Description</b>                                         |
|-------------------------------------------|--------------|------------------------------|------------------------------------------------------|------------------------------------------------------------|
| <b>C</b>                                  | 298.6        | $\mu\text{m}$                | N=4, n=6 arteries<br><b>Fig. S2A</b>                 | Circumference of 3 <sup>rd</sup> order mesenteric arteries |
| <b>C<sub>IEL</sub></b>                    | 298.6        | $\mu\text{m}$                | Assume that it is equal to C                         | Circumference of IEL                                       |
| <b>d</b>                                  | 2.1          | $\mu\text{m}$                | N=5 mice, n=2166<br>HIEL<br><b>Fig. S2B</b>          | Average diameter of HIEL                                   |
| <b><math>\bar{A}_{xy}</math></b>          | 13,942.9     | $\mu\text{m}^2$              | Experimental parameter                               | Area of en face images                                     |
| <b><math>\bar{N}_{\text{HIEL}}</math></b> | 190.7        | HIEL / image                 | N=4, n=4 arteries,<br>n=12 images<br><b>Fig. S2C</b> | Average number of HIEL                                     |
| <b><math>\rho_{\text{HIEL}}</math></b>    | 13.6         | HIEL per $1000\mu\text{m}^2$ | <b>Eq. 1</b>                                         | Density of HIEL per $1000\mu\text{m}^2$                    |

**Table S1: Summary of quantitative data obtained from *en face* images.** Measurements taken from third order mesenteric arteries, either manually, automatically via in-house Matlab program, or calculated from direct measurements.

| <b>Variable</b>            | <b>Value</b> | <b>Units</b>              | <b>Source</b>          | <b>Description</b>                                |
|----------------------------|--------------|---------------------------|------------------------|---------------------------------------------------|
| $Y_{\text{TEM}}$           | 0.070        | $\mu\text{m}$             | Experimental parameter | Thickness of transverse TEM sections              |
| $A_{\text{TEM},1}$         | 20.902       | $\mu\text{m}^2$           | <b>Eq. 2</b>           | Artery area spanning $Y_{\text{TEM}}$             |
| $A_{\text{TEM},d}$         | 627.06       | $\mu\text{m}^2$           | <b>Eq. 4</b>           | Artery area spanning the length <b>d</b>          |
| $L_{\text{IEL}}$           | 1791.6       | $\mu\text{m}$             | <b>Eq. 5</b>           | Length of IEL across 6 TEM sections               |
| $\text{HIEL}_{\text{TEM}}$ | 9            | HIEL per $A_{\text{TEM}}$ | <b>Eq. 6</b>           | Number of HIEL expected across $A_{\text{TEM},d}$ |

**Table S2: Calculated parameters of arterial cross-sections imaged via TEM.** Experimental and calculated parameters for converting *en face* quantitative data to be interpretable in a TEM geometry.

| Case Definition                                                                                                    | Variable              | Value | Units                                                      | Equation                         | Description                                                         |
|--------------------------------------------------------------------------------------------------------------------|-----------------------|-------|------------------------------------------------------------|----------------------------------|---------------------------------------------------------------------|
| <b>Case 1: <u>Maximum case</u>, assumes HIEL are evenly distributed</b>                                            | $D_{\text{HIEL}, E}$  | 54    | TEM detections                                             | <b>Eq. 7</b>                     | HIEL detections over 6 sections for Case 1                          |
| <b>Case 2: Assumes HIEL are <u>randomly distributed</u></b>                                                        | $D_{\text{HIEL}, R}$  | 32    |                                                            | <b>Adjusted Eq. 7 (see text)</b> | HIEL detections over 6 sections for Case 2                          |
| <b>Case 3: <u>Minimum case</u>, represents the <u>rare case</u> where each HIEL only appear on 1/6 of sections</b> | $D_{\text{HIEL}, S}$  | 9     |                                                            | <b>Adjusted Eq. 7 (see text)</b> | HIEL detections over 6 sections for Case 3                          |
| <b>Normalized Case 1</b>                                                                                           | $D_{\text{HIEL}, EN}$ | 30    | TEM detections per <u>1000<math>\mu\text{m}</math> IEL</u> | <b>Eq. 8</b>                     | HIEL detections over 6 sections for Case 1 normalized to IEL length |
| <b>Normalized Case 2</b>                                                                                           | $D_{\text{HIEL}, RN}$ | 17.8  |                                                            | <b>Eq. 9</b>                     | HIEL detections over 6 sections for Case 2 normalized to IEL length |
| <b>Normalized Case 3</b>                                                                                           | $D_{\text{HIEL}, SN}$ | 5     |                                                            | <b>Eq. 10</b>                    | HIEL detections over 6 sections for Case 3 normalized to IEL length |

**Table S3: Case scenarios that consider the potential spatial distributions of HIEL.** Prediction of HIEL incidence in TEM sections with consideration of spatial distributions of evenly distributed (**Case 1**), randomly distributed (**Case 2**), or sparsely distributed (**Case 3**). Predictions are then normalized to obtain ratios with respect to IEL length, a metric that can be reproducibly measured in TEM images (**Normalized Cases 1-3**).
